# Supplementary material for: 2D/2D Z-scheme WO3/g-C3N4 heterojunctions for photocatalytic organic pollutant degradation and nitrogen fixation
Source: Royal Society of Chemistry journal article supplement (doi:10.1039/d3ma00915g), 2023-12-05
Supplement: d3ma00915g1.pdf [file d3ma00915g1.pdf]

## **Supporting Information**

### **2D/2D Z-scheme WO<sub>3</sub>/g-C<sub>3</sub>N<sub>4</sub> heterojunctions for photocatalytic organic pollutant degradation and nitrogen fixation**

Yasi Li<sup>a</sup> and Junkai Wang<sup>\*b</sup>

- a. Department of Mechanical Engineering, College of Engineering, Shantou University, Shantou 515063, China.
- b. College of Chemistry and Chemical Engineering, Shantou University, Shantou 515063, China.

\*Corresponding author:

Junkai Wang (*jkwang@stu.edu.cn*)

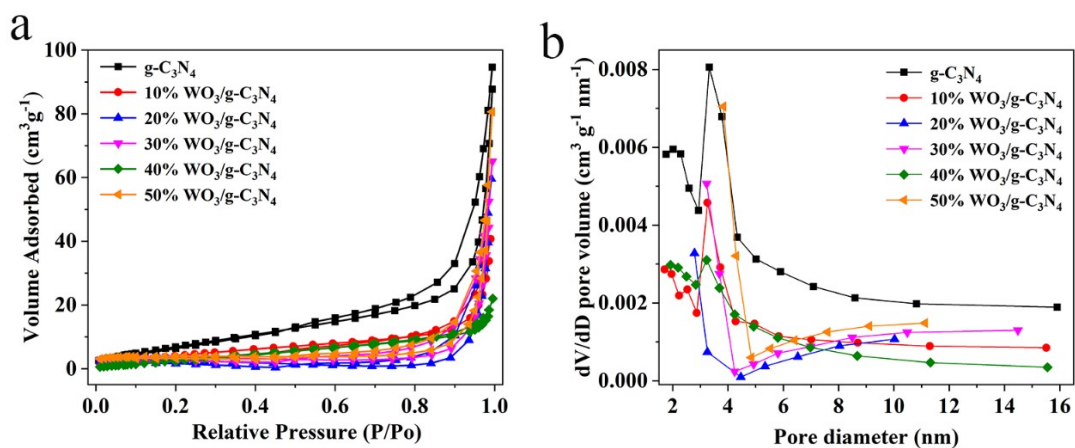

Fig. S1 (a)  $N_2$  adsorption-desorption isotherms and (b) the corresponding pore size distribution curves of  $g-C_3N_4$  and  $WO_3/g-C_3N_4$  composites.

Table S1 Specific surface area, pore volume and Zeta potential of  $g-C_3N_4$  and  $WO_3/g-C_3N_4$  composites.

| Sample              | Specific surface area ( $m^2 g^{-1}$ ) | Pore volume ( $cm^3 g^{-1}$ ) | Zeta potential (mV) |
|---------------------|----------------------------------------|-------------------------------|---------------------|
| $g-C_3N_4$          | 30.44                                  | 0.49                          | -21.6               |
| 10% $WO_3/g-C_3N_4$ | 18.48                                  | 0.22                          | -19.6               |
| 20% $WO_3/g-C_3N_4$ | 11.88                                  | 0.04                          | -23.0               |
| 30% $WO_3/g-C_3N_4$ | 13.69                                  | 0.15                          | -23.8               |
| 40% $WO_3/g-C_3N_4$ | 14.87                                  | 0.12                          | -31.9               |
| 50% $WO_3/g-C_3N_4$ | 14.90                                  | 0.08                          | -29.8               |
